# Supplementary material
Source: HighWire-hosted journal article supplement (https://adc.bmj.com/content/101/7/614)
Supplement: inline-supplementary-material-1 [file inline-supplementary-material-1.pdf]

## Appendix 1:

### Search Strategies:

1. MEDLINE; exp INFANT, NEWBORN/; 474202 results.
2. MEDLINE; (newborn OR neonate OR infant).ti,ab; 211722 results.
3. MEDLINE; exp INFANT, LOW BIRTH WEIGHT/ OR exp INFANT, PREMATURE/; 56310 results.
4. MEDLINE; ((preterm OR prematur\* OR low birth weight) AND (newborn OR neonat\* OR infant)).ti,ab; 15011 results.
5. MEDLINE; 1 OR 2 OR 3 OR 4; 579225 results.
6. MEDLINE; exp JAUNDICE, NEONATAL/; 5793 results.
7. MEDLINE; prolonged.ti,ab; 215785 results.
8. MEDLINE; 6 AND 7; 196 results.
9. MEDLINE; (prolonged AND (newborn OR neonat\* OR infant) AND (jaundice OR hyperbilirubinaemia OR hyperbilirubinemia)).ti,ab; 338 results.
10. MEDLINE; exp HYPERBILIRUBINEMIA, NEONATAL/; 6201 results.
11. MEDLINE; 7 AND 10; 215 results.
12. MEDLINE; 8 OR 9 OR 11; 402 results.
13. MEDLINE; exp URINALYSIS/; 4179 results.
14. MEDLINE; exp MICROBIOLOGY/; 102905 results.
15. MEDLINE; 13 AND 14; 7 results.
16. MEDLINE; (urine AND culture).ti,ab; 5918 results.
17. MEDLINE; (microbiolog\* AND urinalysis).ti,ab; 68 results.
18. MEDLINE; exp URINARY TRACT INFECTIONS/; 37149 results.
19. MEDLINE; (urin\* AND infection\*).ti,ab; 46657 results.
20. MEDLINE; 15 OR 16 OR 17 OR 18 OR 19; 66363 results.
21. MEDLINE; 5 AND 12 AND 20; 15 results.
22. MEDLINE; 13 OR 16 OR 17 OR 18 OR 19; 69830 results.
23. MEDLINE; 5 AND 12 AND 22; **15 results.**
24. EMBASE; exp INFANT/; 514261 results.
25. EMBASE; exp NEWBORN [+NT]/ OR exp NEWBORN/; 463614 results.
26. EMBASE; (newborn OR neonat\* OR infant).ti,ab; 388513 results.
27. EMBASE; exp HYPERBILIRUBINEMIA/ OR exp NEWBORN JAUNDICE/ OR exp JAUNDICE, NEONATAL/; 47026 results.
28. EMBASE; prolonged.ti,ab; 252905 results.
29. EMBASE; 24 OR 25 OR 26; 982532 results.
30. EMBASE; 27 AND 28; 1308 results.
31. EMBASE; 29 AND 30; 514 results.
32. EMBASE; exp URINARY TRACT INFECTION/; 65854 results.
33. EMBASE; exp URINALYSIS/; 58974 results.
34. EMBASE; (urine AND culture).ti,ab; 7668 results.
35. EMBASE; 32 OR 33 OR 34; 122716 results.
36. EMBASE; 31 AND 35; **25 results.**

1. MEDLINE exp INFANT, NEWBORN/ 476598
2. MEDLINE (newborn OR neonate OR infant).ti,ab 213124
3. MEDLINE exp INFANT, LOW BIRTH WEIGHT/ OR exp INFANT, PREMATURE/ 56655
4. MEDLINE ((preterm OR prematur\* OR low birth weight) AND (newborn OR neonat\* OR infant)).ti,ab 15173
5. MEDLINE 1 OR 2 OR 3 OR 4 582496
6. MEDLINE exp JAUNDICE, NEONATAL/ 5796
7. MEDLINE prolonged.ti,ab 217415
8. MEDLINE 6 AND 7 196

9. MEDLINE (prolonged AND (newborn OR neonat\* OR infant) AND (jaundice OR hyperbilirubinaemia OR hyperbilirubinemia)).ti,ab 338
10. MEDLINE exp INFANT, NEWBORN/ OR exp NEONATAL SCREENING/ OR exp INFANT, PREMATURE/ 476704
11. MEDLINE exp JAUNDICE/ OR exp JAUNDICE, NEONATAL/
12. MEDLINE exp JAUNDICE, NEONATAL/ OR exp BILIRUBIN/
13. MEDLINE 2 AND 3
14. MEDLINE prolonged.ti,ab
15. MEDLINE 13 AND 14 227
16. MEDLINE (causes OR aetiology OR incidence OR reason).ti,ab 87188
17. MEDLINE investigation.ti,ab 344952
18. MEDLINE 16 OR 17 1192032
19. MEDLINE 10 AND 13 AND 15 AND 18 40
20. EMBASE, MEDLINE (infant OR new AND born OR newborn OR neonat\*).ti,ab 579206
21. EMBASE, MEDLINE (jaundice OR hyperbilirub\* OR bilirubin).ti,ab 11035
22. EMBASE, MEDLINE prolonged.ti,ab 471803
23. EMBASE, MEDLINE 21 AND 22 3787
24. EMBASE, MEDLINE (cause\* OR aetiology OR incidence OR reason).ti,ab 4207376
25. EMBASE, MEDLINE investigation.ti,ab 765666
26. EMBASE, MEDLINE 15 OR 16
27. EMBASE, MEDLINE 20 AND 23 AND 26 337
28. EMBASE, MEDLINE **18** [Limit to: English Language and (Clinical Queries Diagnosis maximizes sensitivity or Diagnosis maximizes specificity or Diagnosis best balance of sensitivity and specificity or Causation-Etiology maximizes sensitivity or Causation-Etiology maximizes specificity or Causation-Etiology best balance of sensitivity and specificity) and (Languages English)]
